# Supplementary material
Source: MDPI journal article supplement (https://www.mdpi.com/2076-3263/11/12/519)
Supplement: s1 [file s1]

# Supplementary Materials: Controls on the Spatial Distribution of Trace Metal Concentrations along the Bedrock-Dominated South Fork New River, North Carolina

Jerry R. Miller <sup>1,\*</sup>, Xaviera Watkins <sup>2</sup>, Thomas O'Shea <sup>3</sup> and Cynthia Atterholt <sup>4</sup>

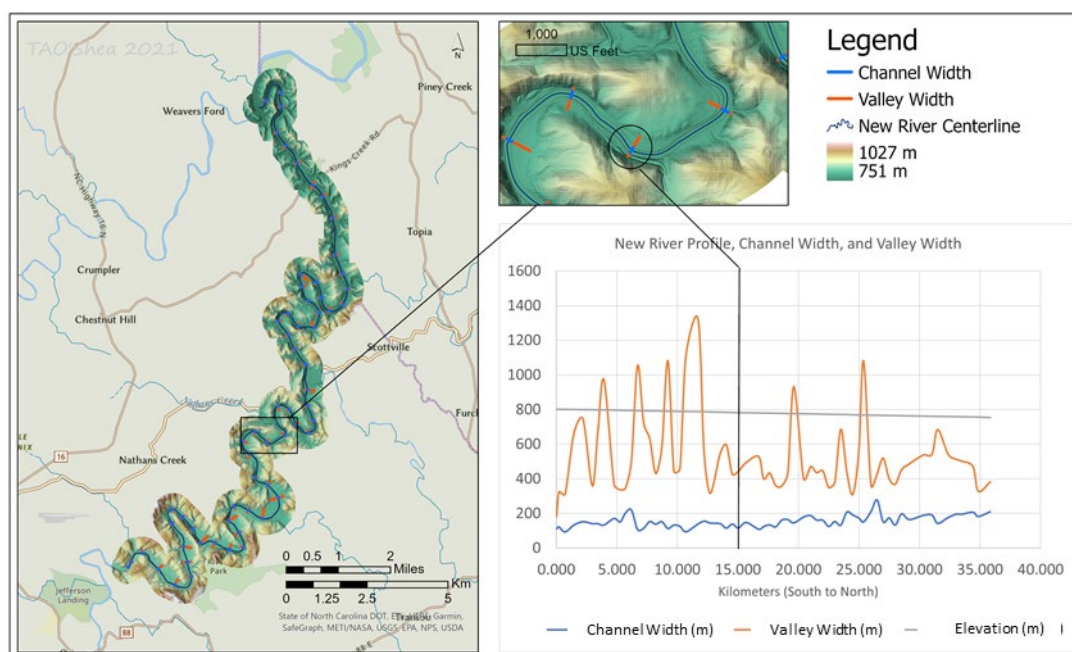

**Figure S1.** Images showing the process used to determine channel and valley width along the river from 1 m resolution LiDAR DEMs.

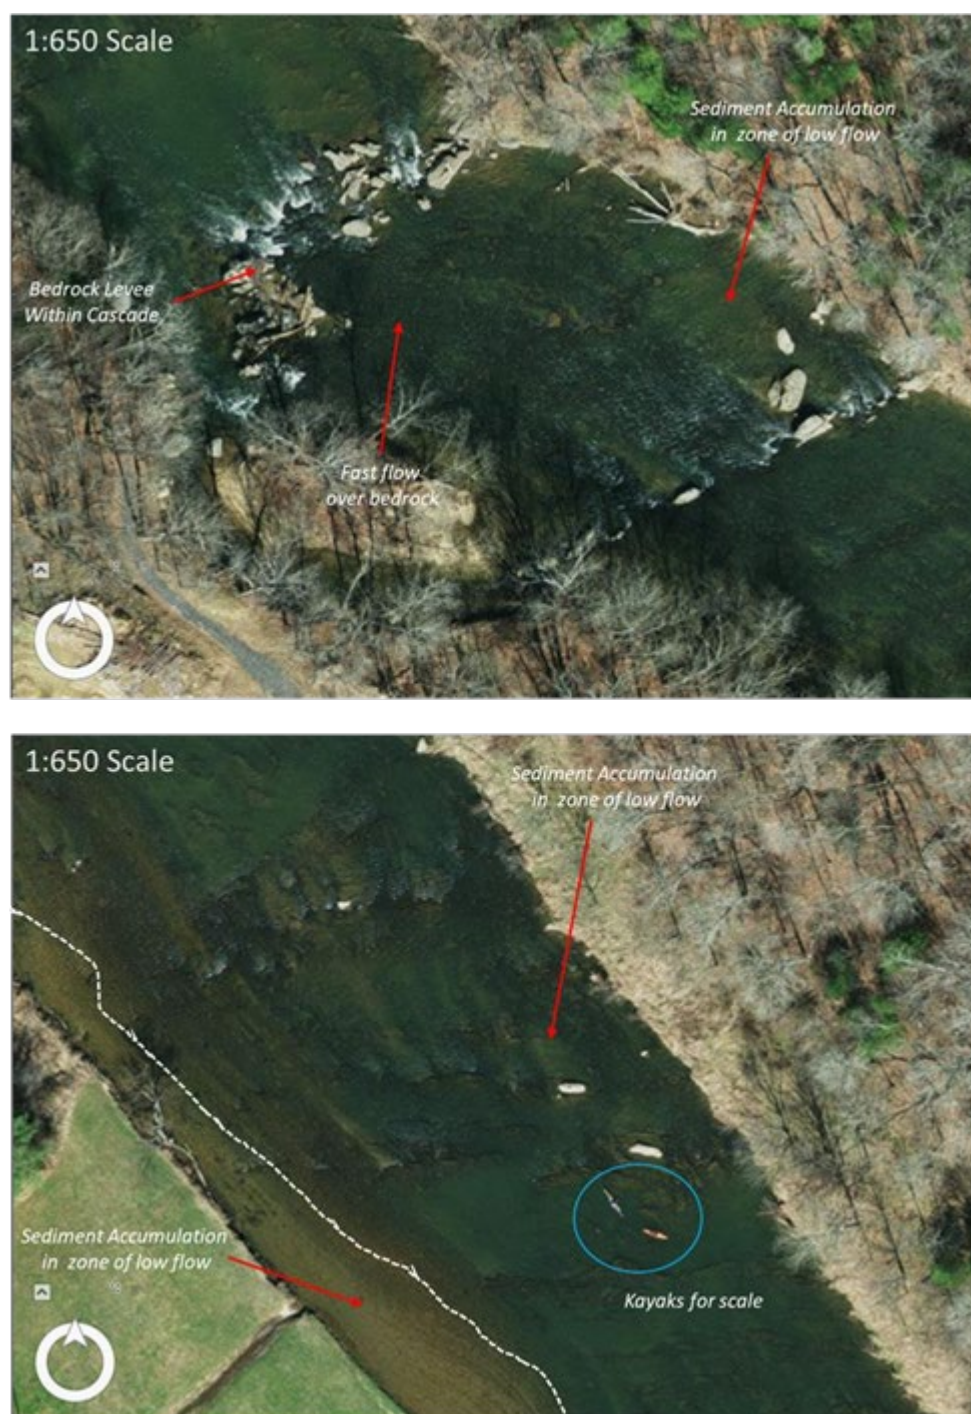

**Figure S2.** Representative images of bedrock reaches showing the general nature of cascades and the distribution of unconsolidated sediments in the vicinity of cascades. Cascades generally consist of resistant topographically high ribs separated by topographically low pools that obliquely traverse the channel (images from NC Center for Geographic Information and Analysis, December 6, 2018. Available: NC One Map, <https://www.nconemap.gov/pages/imagery> (accessed 6 August 2021)).

**Table S1.** Summary of organic matter content, % fine sediment, and metal concentrations in channel bed sediments of the SFNR.

| Parameter        | Mean   | Minimum | Maximum | Std. Dev. | Crustal Ave. <sup>a</sup> |
|------------------|--------|---------|---------|-----------|---------------------------|
| % Fine Sediment  | 4.01   | <2      | 31.20   | 7.14      | NA                        |
| % Organic Matter | 0.69   | 0.16    | 5.21    | 1.03      | NA                        |
| Al (mg/kg)       | 55,294 | 30,961  | 91,613  | 15,136    | 81,497                    |
| Cr (mg/kg)       | 53.54  | 19.09   | 161.54  | 29.14     | 92                        |
| Cu (mg/kg)       | 19.54  | 3.67    | 60.47   | 15.35     | 32                        |
| Fe (mg/kg)       | 32,351 | 4,676   | 70,362  | 17,811    | 39,000                    |
| Mn (mg/kg)       | 797    | 69      | 1,852   | 475       | 775                       |
| Si (mg/kg)       |        |         |         |           |                           |
| Zn (mg/kg)       | 61.45  | 2.17    | 195     | 47.61     | 67                        |

<sup>a</sup>Average composition of upper continental crust [1].

**Table S2.** Summary of Manning-Whitney U test results showing statistical differences between background sites (NR 2 - NR 10) and potentially mine contaminated sites (NR11 - NR26). The null hypothesis is that the distribution between background and potentially contaminated sites are similar. Level of significance set at 95 % confidence level.

| Metal          | Level of Significance | Decision                         |
|----------------|-----------------------|----------------------------------|
| Fine Sediment  | 0.846                 | Accept null hypothesis - similar |
| Organic Matter | 0.187                 | Accept null hypothesis - similar |
| Cr             | 0.169                 | Accept null hypothesis - similar |
| Cu             | 0.329                 | Accept null hypothesis - similar |
| Fe             | 0.169                 | Accept null hypothesis - similar |
| Mn             | 0.934                 | Accept null hypothesis - similar |
| Zn             | 0.487                 | Accept null hypothesis - similar |
| Cr/Si          | 0.074                 | Accept null hypothesis - similar |
| Cu/Si          | 0.301                 | Accept null hypothesis - similar |
| Fe/Si          | 0.152                 | Accept null hypothesis - similar |
| Mn/Si          | 0.667                 | Accept null hypothesis - similar |
| Zn/Si          | 0.357                 | Accept null hypothesis - similar |
| Al/Si          | 0.229                 | Accept null hypothesis - similar |

**Table S3.** Summary of Emergency Response actions taken by the USEPA in 2011 at the Ore Knob Mine Site.

|                                                                                                                                                                                                                                                                                                                                                                                                                                                                                                                                                                                                                                                                                                                                                                                                                                                                                                                                                                                                     |
|-----------------------------------------------------------------------------------------------------------------------------------------------------------------------------------------------------------------------------------------------------------------------------------------------------------------------------------------------------------------------------------------------------------------------------------------------------------------------------------------------------------------------------------------------------------------------------------------------------------------------------------------------------------------------------------------------------------------------------------------------------------------------------------------------------------------------------------------------------------------------------------------------------------------------------------------------------------------------------------------------------|
| Primary objective:                                                                                                                                                                                                                                                                                                                                                                                                                                                                                                                                                                                                                                                                                                                                                                                                                                                                                                                                                                                  |
| Stabilization of the main tailings impoundment dam to prevent a catastrophic release of tailings to downstream waters.                                                                                                                                                                                                                                                                                                                                                                                                                                                                                                                                                                                                                                                                                                                                                                                                                                                                              |
| Specific actions:                                                                                                                                                                                                                                                                                                                                                                                                                                                                                                                                                                                                                                                                                                                                                                                                                                                                                                                                                                                   |
| <ul style="list-style-type: none"> <li>Removed 12,333 m<sup>3</sup> of tailings from the main tailings impoundment sediment pond; action allowed the pond to continue to capture additional sediment;</li> <li>Constructed a diversion channel around the main tailings impoundment area to direct storm water downstream. Action intended to minimize erosion of the dam face and limit acid mine drainage.</li> <li>Filled four ponds adjacent to the main tailings impoundment area to reduce surface water infiltration into the tailings wastes. <ul style="list-style-type: none"> <li>Re-faced the main tailings impoundment area.</li> </ul> </li> <li>Removed 45873 m<sup>3</sup> of mine tailings from the tailings dam at the 1950s mine and mill area.</li> <li>Constructed catchment basins to minimize the flow of sediment into the diversion channel.</li> <li>Reconstructed the sediment pond embankment to provide more stability and increase sediment pond capacity.</li> </ul> |

(from USEPA – Ore Knob Mine Superfund Site Summary:  
<https://cumulis.epa.gov/supercpad/SiteProfiles/index.cfm?fuseaction=sec-ond.cleanup&id=0409895>, accessed 6 August 2021) [2].

**Table S4.** General description of geological units underlying the South Fork New River (from NC One Map; Published July 2009; accessed 8 October 2021; URL - <https://www.nconemap.gov/datasets/geology/explore?location=35.154912%2C-79.920500%2C7.20>, accessed 6 August 2021).

| Rock Unit (formation)    | Estimated Age      | General Description                                                                                                                                                                                               |
|--------------------------|--------------------|-------------------------------------------------------------------------------------------------------------------------------------------------------------------------------------------------------------------|
| Amphibolite              | Late Proterozoic   | Equigranular, massive to well foliated, interlayered, rarely discordant, metamorphosed intrusive and extrusive mafic rock; may include metasedimentary rock                                                       |
| Muscovite-biotite gneiss | Late Proterozoic   | Locally sulfidic; interlayered and gradational with mica schist, minor amphibolite, and hornblende gneiss                                                                                                         |
| Biotite granitic gneiss  | Middle Proterozoic | Pinkish gray to light gray, massive to well foliated, granitic to quartz monzonitic; includes variably mylonitized orthogneiss and paragneiss, interlayered amphibolite, calc-silicate rock, and marble. Includes |
| Mica Schist              | Late Proterozoic   | Locally sulfidic and graphitic; minor interlayered mica gneiss and amphibolite                                                                                                                                    |
| Gneiss                   | Late Proterozoic   | Finely laminated to thin layered; locally contains massive gneiss and micaceous granule conglomerate; includes schist, phyllite, and amphibolite                                                                  |

**Table S5.** Summary of Kruskal-Wallis test results showing statistical differences between bedrock types. sites along entire study reach (NR 2 - NR 26). Three bedrock units were including a gneiss, an amphibolite, and a granitic gneiss. Local outcrops of mica schist and metasedimentary rock (which each underlaid two sites each) were not included given their small sample size. The null hypothesis is that the distribution across all bedrock units is similar. Level of significance set at 95 % confidence level.

| Metal          | Level of Significance | Decision                         |
|----------------|-----------------------|----------------------------------|
| Fine Sediment  | 0.330                 | Accept null hypothesis - similar |
| Organic Matter | 0.255                 | Accept null hypothesis - similar |
| Cr             | 0.410                 | Accept null hypothesis - similar |
| Cu             | 0.131                 | Accept null hypothesis - similar |
| Fe             | 0.0556                | Accept null hypothesis - similar |
| Mn             | 0.074                 | Accept null hypothesis - similar |
| Zn             | 0.054                 | Accept null hypothesis - similar |
| Cr/Si          | 0.402                 | Accept null hypothesis - similar |
| Cu/Si          | 0.207                 | Accept null hypothesis - similar |
| Fe/Si          | 0.065                 | Accept null hypothesis - similar |
| Mn/Si          | 0.365                 | Accept null hypothesis - similar |
| Zn/Si          | 0.058                 | Accept null hypothesis - similar |
| Al/Si          | 0.452                 | Accept null hypothesis - similar |



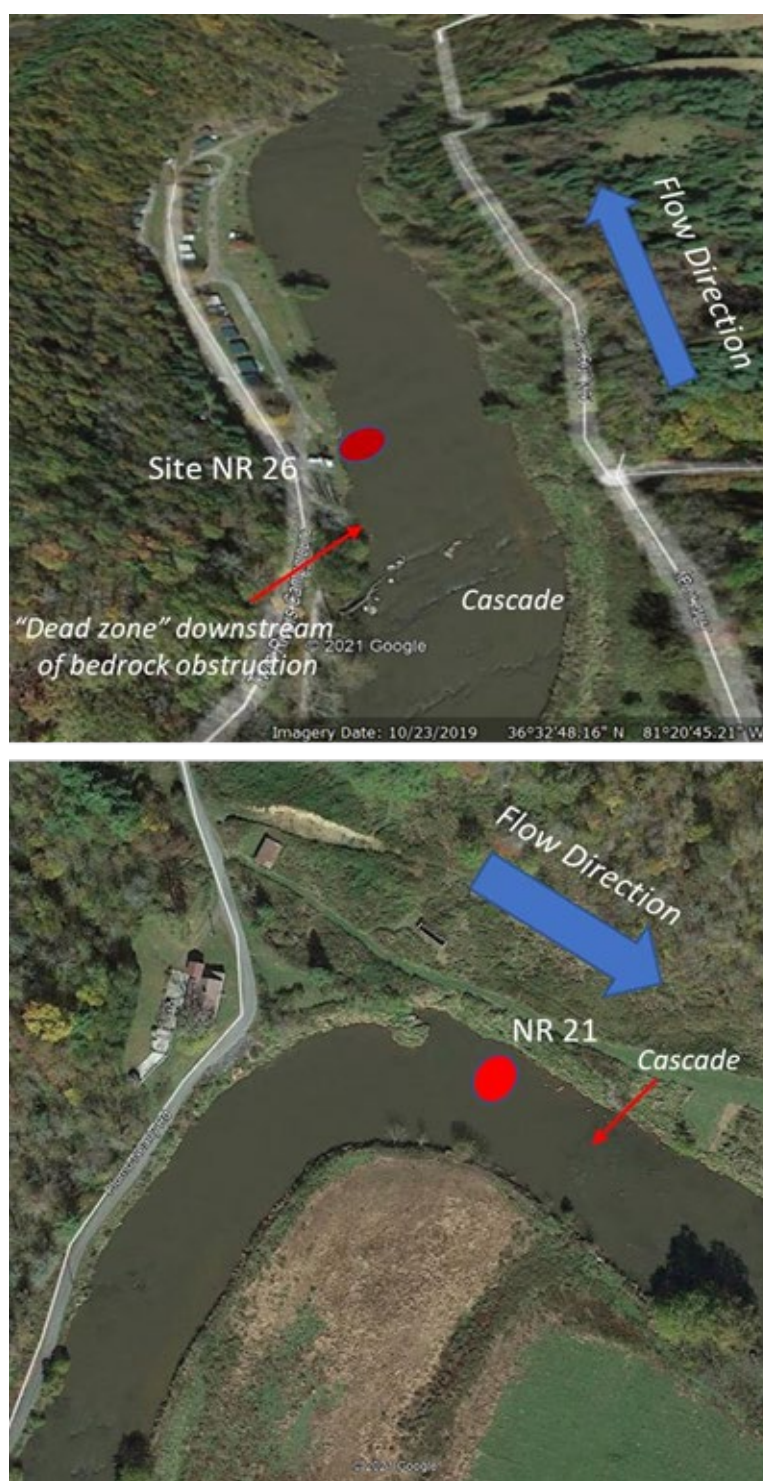

**Figure S3.** Areal view of sampling sites NR 21 and NR 26. Both sites exhibit relatively high fine sediment contents and are located in close proximity to bedrock cascades that obstruct flow. Google Earth images obtained on 10 June 2021; Date images taken: 23 October 2019.

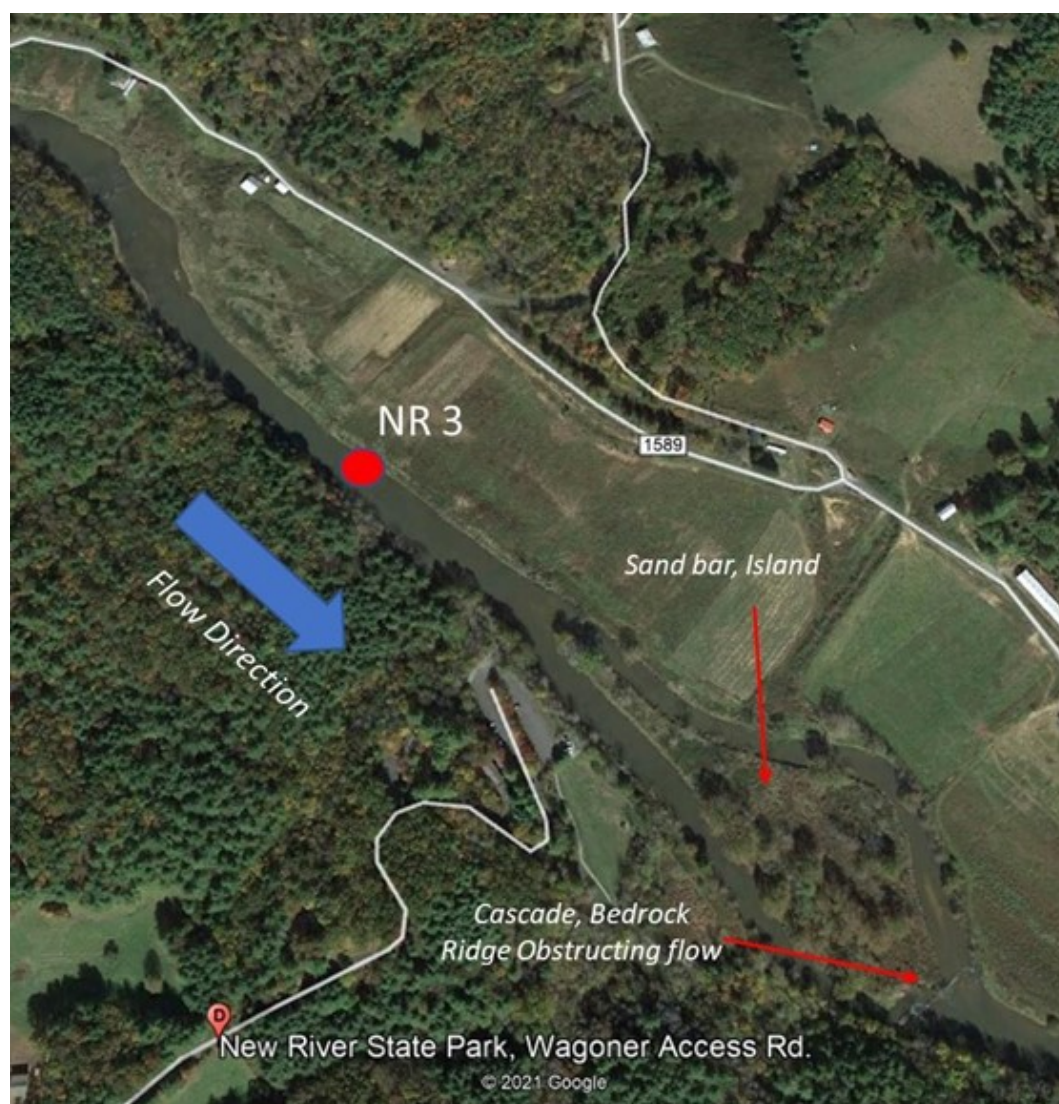

**Figure S4.** Areal view of sampling sites NR 3. All three exhibit relatively high fine sediment contents and are located in close proximity to bedrock cascades that obstruct flow. Google Earth images obtained on 10 June 2021; Date images taken: 23 October 2019.

**Table S6.** Summary of Manning-Whitney U test results showing statistical differences between pool and riffle sites along entire study reach (NR 2 - NR 26). The null hypothesis is that the distribution between background and potentially contaminated sites are similar. Level of significance set at 95 % confidence level.

| Metal          | Level of Significance | Decision                         |
|----------------|-----------------------|----------------------------------|
| Fine Sediment  | 0.611                 | Accept null hypothesis - similar |
| Organic Matter | 0.111                 | Accept null hypothesis - similar |
| Cr             | 0.695                 | Accept null hypothesis - similar |
| Cu             | 0.852                 | Accept null hypothesis - similar |
| Fe             | 0.782                 | Accept null hypothesis - similar |
| Mn             | 0.376                 | Accept null hypothesis - similar |
| Zn             | 0.894                 | Accept null hypothesis - similar |
| Cr/Si          | 0.186                 | Accept null hypothesis - similar |
| Cu/Si          | 0.689                 | Accept null hypothesis - similar |
| Fe/Si          | 0.689                 | Accept null hypothesis - similar |
| Mn/Si          | 0.769                 | Accept null hypothesis - similar |
| Zn/Si          | 0.894                 | Accept null hypothesis - similar |
| Al/Si          | 0.538                 | Accept null hypothesis - similar |
