# Supplementary material
Source: MDPI journal article supplement (https://www.mdpi.com/2076-3263/11/12/519)
Supplement: s1 [file s1]

Archive with 1 entries (1 files):
- geosciences-1446120-supplementary.pdf
